# Supplementary material for: The Complex Associations Between Early Childhood Adversity, Heart Rate Variability, Cluster B Personality Disorders, and Aggression
Source: PubMed Central journal article supplement — Int J Offender Ther Comp Criminol. 2021 Jan 7;65(8):899–915. doi: 10.1177/0306624X20986537 (PMC8111233; doi:10.1177/0306624x20986537), 2021-01-07

**Table A1***SEM Summary Table for Time-domain HRV Showing Standardized and Unstandardized**Regression Weights*

| HRV variable included in the model and paths |          |          |          |          |
|----------------------------------------------|----------|----------|----------|----------|
| HRV variable: IBI                            | Estimate | Std. Err | Std. all | <i>P</i> |
| Aggression                                   |          |          |          |          |
| Adversity (c)                                | 0.114    | 0.106    | 0.163    | 0.283    |
| IBI (e)                                      | -6.864   | 12.498   | -0.102   | 0.583    |
| Cluster B (f)                                | 3.100    | 2.551    | 0.179    | 0.224    |
| IBI                                          |          |          |          |          |
| Age (g)                                      | 0.002    | 0.002    | 0.142    | 0.401    |
| Adversity (a)                                | 0.001    | 0.002    | 0.062    | 0.733    |
| Cluster B                                    |          |          |          |          |
| IBI (d)                                      | -0.665   | 0.430    | -0.172   | 0.122    |
| Adversity (b)                                | 0.015    | 0.005    | 0.365    | 0.004    |
| Indirect path adf                            | -0.001   | 0.007    | -0.002   | 0.856    |
| Indirect path ae                             | -0.004   | 0.029    | -0.006   | 0.878    |
| Indirect path bf                             | 0.045    | 0.046    | 0.065    | 0.328    |
| HRV variable: SDNN                           | Estimate | Std. Err | Std. all | <i>P</i> |
| Aggression                                   |          |          |          |          |
| Adversity (c)                                | 0.105    | 0.112    | 0.151    | 0.344    |
| SDNN (e)                                     | 1.950    | 73.385   | 0.005    | 0.979    |
| Cluster B (f)                                | 3.458    | 2.460    | 0.199    | 0.160    |
| SDNN                                         |          |          |          |          |
| Age (g)                                      | -0.001   | 0.000    | -0.297   | 0.028    |
| Adversity (a)                                | -0.000   | 0.000    | -0.051   | 0.623    |
| Cluster B                                    |          |          |          |          |
| SDNN (d)                                     | -2.365   | 2.816    | -0.105   | 0.401    |
| Adversity (b)                                | 0.014    | 0.005    | 0.354    | 0.007    |
| Indirect path adf                            | 0.001    | 0.003    | 0.001    | 0.824    |
| Indirect path ae                             | -0.000   | 0.014    | -0.000   | 0.989    |
| Indirect path bf                             | 0.049    | 0.044    | 0.071    | 0.263    |
| HRV variable: RMSSD                          | Estimate | Std. Err | Std. all | <i>P</i> |
| Aggression                                   |          |          |          |          |
| Adversity (c)                                | 0.102    | 0.104    | 0.147    | 0.327    |
| RMSSD (e)                                    | -35.203  | 86.199   | -0.057   | 0.683    |
| Cluster B (f)                                | 3.389    | 2.503    | 0.195    | 0.176    |
| RMSSD                                        |          |          |          |          |
| Age (g)                                      | -0.000   | 0.000    | -0.239   | 0.183    |
| Adversity (a)                                | -0.000   | 0.000    | -0.124   | 0.279    |
| Cluster B                                    |          |          |          |          |
| RMSSD (d)                                    | -1.824   | 4.599    | -0.052   | 0.692    |
| Adversity (b)                                | 0.014    | 0.005    | 0.351    | 0.007    |

---

|                   |       |       |       |       |
|-------------------|-------|-------|-------|-------|
| Indirect path adf | 0.001 | 0.004 | 0.001 | 0.824 |
| Indirect path ae  | 0.005 | 0.018 | 0.007 | 0.778 |
| Indirect path bf  | 0.048 | 0.042 | 0.069 | 0.254 |

---

*Note.* IBI=Inter-beat Interval, RMSSD= Root Mean Square of the Successive Differences;

SDNN= Standard Deviation of Normal to Normal R-R intervals, Std. Err= Standard Errors;

Std. all=All variables are standardized.

**Table A2***SEM Summary Table for Frequency-domain HRV Showing Standardized and Unstandardized**Regression Weights*

| HRV variable included in the model and paths |          |          |          |          |
|----------------------------------------------|----------|----------|----------|----------|
| HRV variable: LF                             | Estimate | Std. Err | Std. all | <i>P</i> |
| Aggression                                   |          |          |          |          |
| Adversity (c)                                | 0.087    | 0.100    | 0.125    | 0.385    |
| LF (e)                                       | 0.053    | 0.044    | 0.177    | 0.229    |
| Cluster B (f)                                | 3.525    | 2.472    | 0.203    | 0.154    |
| LF                                           |          |          |          |          |
| Age (g)                                      | -0.844   | 0.379    | -0.322   | 0.026    |
| Adversity (a)                                | 0.255    | 0.372    | 0.109    | 0.493    |
| Cluster B                                    |          |          |          |          |
| LF (d)                                       | -0.000   | 0.002    | -0.023   | 0.866    |
| Adversity (b)                                | 0.014    | 0.005    | 0.360    | 0.005    |
| Indirect path adf                            | -0.000   | 0.004    | -0.001   | 0.933    |
| Indirect path ae                             | 0.013    | 0.025    | 0.019    | 0.589    |
| Indirect path bf                             | 0.051    | 0.045    | 0.073    | 0.260    |
| HRV variable: HF                             | Estimate | Std. Err | Std. all | <i>P</i> |
| Aggression                                   |          |          |          |          |
| Adversity (c)                                | 0.091    | 0.111    | 0.131    | 0.413    |
| HF (e)                                       | -0.053   | 0.079    | -0.098   | 0.500    |
| Cluster B (f)                                | 3.808    | 2.661    | 0.220    | 0.153    |
| HF                                           |          |          |          |          |
| Age (g)                                      | 0.173    | 0.301    | 0.121    | 0.565    |
| Adversity (a)                                | -0.160   | 0.157    | -0.125   | 0.309    |
| Cluster B                                    |          |          |          |          |
| HF (d)                                       | 0.006    | 0.006    | 0.190    | 0.347    |
| Adversity (b)                                | 0.015    | 0.005    | 0.382    | 0.002    |
| Indirect path adf                            | -0.004   | 0.008    | -0.005   | 0.646    |
| Indirect path ae                             | 0.009    | 0.018    | 0.012    | 0.645    |
| Indirect path bf                             | 0.059    | 0.048    | 0.084    | 0.225    |
| HRV variable: LF/HF                          | Estimate | Std. Err | Std. all | <i>P</i> |
| Aggression                                   |          |          |          |          |
| Adversity (c)                                | 0.102    | 0.111    | 0.146    | 0.358    |
| LF/HF (e)                                    | 0.062    | 0.297    | 0.034    | 0.834    |
| Cluster B (f)                                | 3.643    | 2.780    | 0.210    | 0.190    |
| LF/HF                                        |          |          |          |          |
| Age (g)                                      | -0.054   | 0.059    | -0.129   | 0.360    |
| Adversity (a)                                | 0.008    | 0.051    | 0.021    | 0.874    |
| Cluster B                                    |          |          |          |          |
| LF/HF (d)                                    | -0.032   | 0.012    | -0.295   | 0.007    |
| Adversity (b)                                | 0.015    | 0.005    | 0.366    | 0.004    |

---

|                   |        |       |        |       |
|-------------------|--------|-------|--------|-------|
| Indirect path adf | -0.001 | 0.008 | -0.001 | 0.905 |
| Indirect path ae  | 0.001  | 0.015 | 0.001  | 0.973 |
| Indirect path bf  | 0.054  | 0.048 | 0.077  | 0.259 |

---

*Note.* LF=Low Frequency Power of Heart Rate Variability, HF=High Frequency Power

of Heart Rate Variability; LF/HF=Ratio between Low and High Frequency Components of

Heart Rate Variability; Std. Err= Standard Errors; Std. all=All variables are standardized.

**Table A3**

*Association between Different Forms of Early Childhood Adversity and SDNN Adjusted for age*

|                   | B     | SE   | 95% CI |       | P    |
|-------------------|-------|------|--------|-------|------|
|                   |       |      | LL     | UL    |      |
| Emotional abuse   | .000  | .001 | -.002  | .002  | .855 |
| Emotional neglect | .001  | .001 | -.001  | .002  | .294 |
| Physical abuse    | .001  | .001 | -.001  | .002  | .261 |
| Physical neglect  | -.004 | .001 | -.006  | -.001 | .004 |
| Sexual abuse      | -.001 | .001 | -.002  | .001  | .343 |
| Age               | -.001 | .000 | -.001  | .000  | .012 |

*Note.* CI = confidence interval; *LL* = lower limit; *UL* = upper limit; SDNN= Standard

Deviation of Normal to Normal R-R intervals.

**Table A4**

*Association between Different Forms of Early Childhood Adversity and RMSSD Adjusted for age*

|                   | B     | SE   | 95% CI |      | P    |
|-------------------|-------|------|--------|------|------|
|                   |       |      | LL     | UL   |      |
| Emotional abuse   | .000  | .001 | -.001  | .001 | .809 |
| Emotional neglect | .000  | .000 | -.001  | .001 | .492 |
| Physical abuse    | .000  | .000 | -.001  | .001 | .412 |
| Physical neglect  | -.002 | .001 | -.003  | .000 | .030 |
| Sexual abuse      | -.001 | .000 | -.001  | .000 | .204 |
| Age               | .000  | .000 | -.001  | .000 | .115 |

*Note.* CI = confidence interval; *LL* = lower limit; *UL* = upper limit; RMSSD= Root Mean

Square of the Successive Differences.

### **Description of the Virtual Reality Aggression Prevention Training**

The theoretical framework for the Virtual Reality Aggression Prevention Training (VRAPT) has been developed through the six steps of the Social Information Processing theory (SIP; Walther, 2008) that have been converted into six questions: 1) What is going on? 2) What does this mean? 3) What is the goal I'm trying to achieve in this situation? 4) How can I respond to this? 5) What am I going to do? and 6) Enacting responses: response or behavior. Each step is practiced separately during the VRAPT in the interactive three-dimensional virtual environment. During the session, participants can practice, for example, recognizing facial emotions of others (i.e., What is going on?), or assessing the aggression level of the virtual character's behaviors (i.e., What does this mean?). Different interactive social scenarios are designed to help participants learn to cope with their aggression adequately. Some examples of social scenarios are the following: The participant is waiting in a row in the virtual supermarket to pay for the purchased products. When it is almost his turn, an avatar is trying to push forward and the participant is asked to respond to this inappropriate behavior of the avatar (Figure A1). In another scenario, the participant must order a drink at the coffee shop, unfortunately, the bar has just been closed and the avatar makes it aggressively clear that the bar is closed. The participant must respond assertively while being provoked and must insist on getting a drink (Figure A2). During the VRAPT, participants are wearing headphones and a head-mounted display while interacting with a virtual avatar. The trainer controls the avatar by taking on the role of it by using a microphone with voice distortion for speech, and by manually controlling the avatar's emotional facial expressions and bodily movements. Lastly, the trainer also controls the virtual environment and can immediately change and/or stop it if necessary.

**Figure A1**

*Virtual Environment: Supermarket*

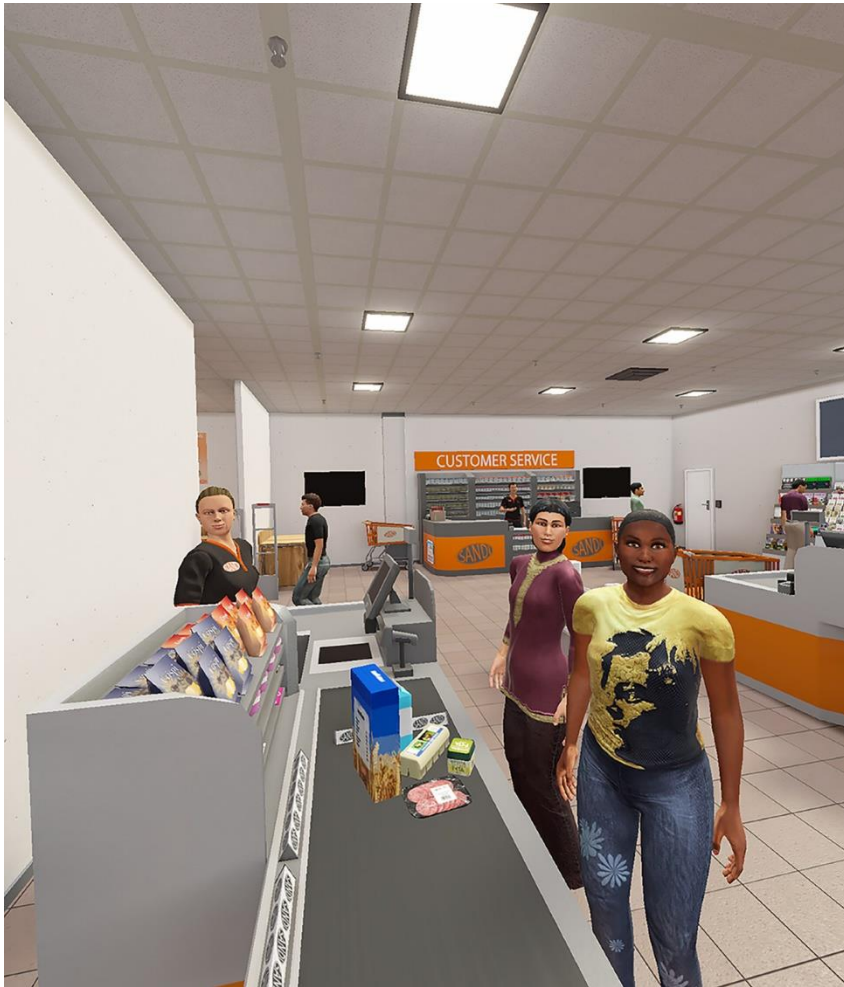



**Figure A2**

*Virtual Environment: Coffee Shop*

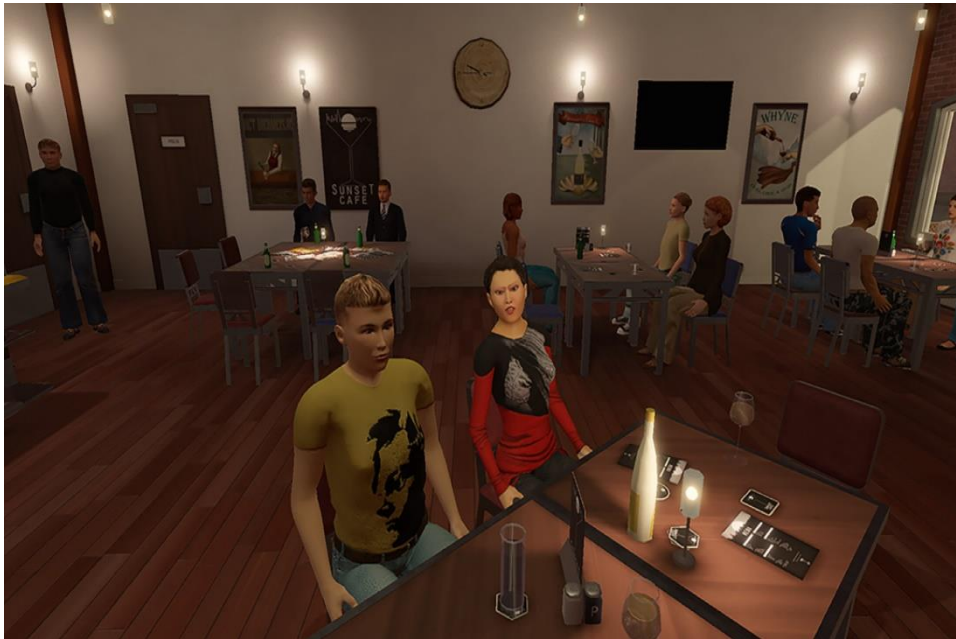

Supplement: sj-pdf-1-ijo-10.1177_0306624X20986537.pdf [file sj-pdf-1-ijo-10.1177_0306624X20986537.pdf]
